# Supplementary material for: CbtA toxin of Escherichia coli inhibits cell division and cell elongation via direct and independent interactions with FtsZ and MreB
Source: PubMed Central journal article supplement (PMC5624674; doi:10.1371/journal.pgen.1007007), 2017-09-20
Supplement: pgen.1007007.s007.pdf [file pgen.1007007.s007.pdf]

**S1 Table. Summary of two-hybrid interactions of  $\alpha$ -MreB double-protofilament interface mutants.**

| $\alpha$ -MreB mutant | $\lambda$ CI-CbtA <sup>†</sup> | $\lambda$ CI-RodZ <sub>NTD</sub> <sup>‡</sup> |
|-----------------------|--------------------------------|-----------------------------------------------|
| WT                    | +++                            | +++                                           |
| K77D                  | ++                             | ++                                            |
| D78K                  | ++                             | +++                                           |
| F84A                  | -                              | ++                                            |
| V121E                 | +++                            | +++                                           |
| R124D                 | ++                             | +++                                           |
| A125D                 | ++                             | ++                                            |
| I126V*                | -                              | +++                                           |
| R127D                 | +                              | -                                             |
| E128K                 | ++++                           | +++                                           |
| V173A*                | -                              | ++                                            |
| R188D                 | ++++                           | +++                                           |
| D192K                 | -                              | ++                                            |
| E196G*                | +                              | +++                                           |
| E196K                 | +                              | +++                                           |
| N200A                 | +++                            | +++                                           |
| R204D                 | ++                             | ++++                                          |
| E262G*                | -                              | ++                                            |
| E262K                 | +                              | +++                                           |
| G266E                 | ++++                           | ++++                                          |
| S269F                 | +++++                          | +++                                           |
| V273E                 | ++++                           | ++++                                          |
| S284D                 | +++                            | ++++                                          |

- less than 40% of wild-type interaction; + 40-59% of wild-type interaction; ++ 60-89% of wild-type interaction; +++ 90-100% of wild-type interaction; ++++ 101-200% of wild-type interaction; +++++ greater than 200% of wild-type interaction

<sup>†</sup> $\lambda$ CI-CbtA interactions were assessed at 100  $\mu$ M IPTG

<sup>‡</sup> $\lambda$ CI-RodZ<sub>NTD</sub> interactions were assessed at 25  $\mu$ M IPTG

\* These mutants were identified in our original two-hybrid screen
