# Supplementary material for: CbtA toxin of Escherichia coli inhibits cell division and cell elongation via direct and independent interactions with FtsZ and MreB
Source: PubMed Central journal article supplement (PMC5624674; doi:10.1371/journal.pgen.1007007), 2017-09-20
Supplement: pgen.1007007.s008.pdf [file pgen.1007007.s008.pdf]

**S2 Table. Bacterial strains used in this study.**

| Strain                           | Description                                                                                                                                                                                                                                       | Reference/Source                   |
|----------------------------------|---------------------------------------------------------------------------------------------------------------------------------------------------------------------------------------------------------------------------------------------------|------------------------------------|
| <b><i>E. coli</i> strains:</b>   |                                                                                                                                                                                                                                                   |                                    |
| NEB5- $\alpha$ F1 <sup>q</sup>   | DH5- $\alpha$ derivative containing an F' (Tet resistant) bearing <i>lacI</i> <sup>q</sup>                                                                                                                                                        | New England Biolabs                |
| BW27785                          | $\Delta(\textit{araB-araD})567 \Delta\textit{lacZ4787}>::\textit{rrnB-3}$ LAM- $\Delta(\textit{araH-araF})570>::\textit{FRT} \Delta\textit{araEp-532}>::\textit{FRT} \phi(\textit{Pcp18-araE534}) \Delta(\textit{rhaB-rhaD})568 \textit{hsdR514}$ | [1,2]                              |
| NP1 (TB28 <i>zapA-gfp frt</i> )  | TB28 (MG1655 $\Delta\textit{lacIZYA}>::\textit{frt}$ ) producing ZapA-GFP from the native chromosomal locus. Linked <i>cat</i> cassette has been removed by FLP recombinase.                                                                      | [3]                                |
| TB28 HKHC488                     | TB28 with plasmid pCH488 ( <i>plac:sfgfp-ftsZ bla</i> ) integrated into the chromosome at the attHK002 site.                                                                                                                                      | H. Cho and T. Bernhardt            |
| FW102 O <sub>L</sub> 2-62        | FW102 [4] containing an F' (Kan resistant) bearing the <i>plac</i> O <sub>L</sub> 2-62- <i>lacZ</i> fusion in which the $\lambda$ CI operator is centered at position -62 upstream of the <i>lac</i> promoter.                                    | [5]                                |
| BN30 (FW102 O <sub>L</sub> 2-42) | FW102 [4] containing an F' (Kan resistant) bearing the <i>plac</i> OL <sub>2</sub> -42- <i>lacZ</i> fusion in which the $\lambda$ CI operator is centered at position -42 upstream of the <i>lac</i> promoter.                                    | [6]                                |
| CH45/pDB346                      | <i>ftsZ</i> <sup>0</sup> / $\Delta$ PR- <i>ftsZ</i> , <i>cl857</i> ; <i>ftsZ</i> expression is repressed upon shift to 30 °C ; plasmid confers resistance to Spec                                                                                 | [7,8]                              |
| FB30/pFB174                      | TB28 (MG1655 $\Delta\textit{lacIZYA}>::\textit{frt}$ ) $\Delta\textit{mreBCD}>::\textit{kan}$ transformed with Cm resistant plasmid pFB174 ( <i>pBAD-mreBCD-LE</i> )                                                                              | [9]                                |
| DH73                             | BW27785 with <i>ftsZ-L169P</i> allele at the endogenous <i>ftsZ</i> locus. Mutation is not linked to a selectable marker                                                                                                                          | This study                         |
| DH118/pFB149                     | BW27785 $\Delta\textit{mreBCD}>::\textit{kan}$ transformed with Carb resistant plasmid pFB149 ( <i>plac-mreBCD-LE</i> )                                                                                                                           | Strain: this study<br>Plasmid: [9] |
| DH118/pDH278                     | BW27785 $\Delta\textit{mreBCD}>::\textit{kan}$ transformed with Carb resistant plasmid pDH278 ( <i>plac-mreB-E262G mreCD-LE</i> )                                                                                                                 | This study                         |
| DH118/pDH332                     | BW27785 $\Delta\textit{mreBCD}>::\textit{kan}$ transformed with Carb resistant plasmid pDH332 ( <i>plac-mreB-S269F mreCD-LE</i> )                                                                                                                 | This study                         |

**S2 Table (continued). Bacterial strains used in this study.**

| Strain                             | Description                                                                                                                                                                                                                                                                                                      | Reference/Source |
|------------------------------------|------------------------------------------------------------------------------------------------------------------------------------------------------------------------------------------------------------------------------------------------------------------------------------------------------------------|------------------|
| <b><i>B. subtilis</i> strains:</b> | All PY79 derivatives                                                                                                                                                                                                                                                                                             | [10]             |
| DH84                               | <i>ycgO:: pHYPERSPANK-his<sub>6</sub>-gfp erm</i>                                                                                                                                                                                                                                                                | This study       |
| DH85                               | <i>ycgO:: pHYPERSPANK-his<sub>6</sub>-cbtA-gfp erm</i>                                                                                                                                                                                                                                                           | This study       |
| DH98                               | <i>ftsZ spec</i> ( <i>spec</i> cassette is immediately downstream of the wildtype <i>ftsZ</i> ORF)                                                                                                                                                                                                               | This study       |
| DH99                               | <i>ftsZ (loop<sup>Eco</sup>) spec</i> ( <i>spec</i> cassette is immediately downstream of the <i>ftsZ</i> locus. The wt <i>ftsZ</i> allele is replaced with a chimeric <i>ftsZ</i> encoding <i>Eco</i> residues 168-182 in place of <i>Bsu</i> residues 169-183 in the context of full-length <i>Bsu ftsZ</i> .) | This study       |
| DH100                              | <i>ftsZ spec, ycgO:: pHYPERSPANK-his<sub>6</sub>-gfp erm</i>                                                                                                                                                                                                                                                     | This study       |
| DH101                              | <i>ftsZ spec, ycgO:: pHYPERSPANK-his<sub>6</sub>-cbtA-gfp erm</i>                                                                                                                                                                                                                                                | This study       |
| DH102                              | <i>ftsZ (loop<sup>Eco</sup>) spec, ycgO:: pHYPERSPANK-his<sub>6</sub>-gfp erm</i>                                                                                                                                                                                                                                | This study       |
| DH103                              | <i>ftsZ (loop<sup>Eco</sup>) spec, ycgO:: pHYPERSPANK-his<sub>6</sub>-cbtA-gfp erm</i>                                                                                                                                                                                                                           | This study       |
| DH104                              | <i>ftsZ spec, ycgO:: pHYPERSPANK-his<sub>6</sub>-cbtA-F65S-gfp erm</i>                                                                                                                                                                                                                                           | This study       |
| DH106                              | <i>ftsZ (loop<sup>Eco</sup>) spec, ycgO:: pHYPERSPANK-his<sub>6</sub>-cbtA-F65S-gfp erm</i>                                                                                                                                                                                                                      | This study       |

1. Khlebnikov A, Datsenko KA, Skaug T. Homogeneous expression of the PBAD promoter in *Escherichia coli* by constitutive expression of the low-affinity high-capacity AraE transporter. *Microbiology*. 2001;(147):3241–7.
2. Garrity SJ, Sivanathan V, Dong J, Lindquist S, Hochschild A. Conversion of a yeast prion protein to an infectious form in bacteria. *Proc Natl Acad Sci U S A*. National Acad Sciences; 2010 Jun 8;107(23):10596–601.
3. Peters NT, Dinh T, Bernhardt TG. A Fail-Safe Mechanism in the Septal Ring Assembly Pathway Generated by the Sequential Recruitment of Cell Separation Amidases and Their Activators. *J Bacteriol*. 2011 Aug 25;193(18):4973–83.
4. Whipple FW. Genetic analysis of prokaryotic and eukaryotic DNA-binding proteins in *Escherichia*

- coli*. Nucleic Acids Res. Oxford University Press; 1998 Aug 15;26(16):3700–6.
5. Deaconescu AM, Chambers AL, Smith AJ, Nickels BE, Hochschild A, Savery NJ, et al. Structural Basis for Bacterial Transcription-Coupled DNA Repair. *Cell*. 2006 Feb;124(3):507–20.
  6. Castang S, Dove SL. High-order oligomerization is required for the function of the H-NS family member MvaT in *Pseudomonas aeruginosa*. *Mol Microbiol*. 2010 Sep 24;78(4):916–31.
  7. Raskin DM, de Boer PA. The MinE ring: an FtsZ-independent cell structure required for selection of the correct division site in *E. coli*. *Cell*. 1997 Nov 28;91(5):685–94.
  8. Skoog K, Daley DO. The *Escherichia coli* Cell Division Protein ZipA Forms Homodimers Prior to Association with FtsZ. *Biochemistry*. 2012 Feb 21;51(7):1407–15.
  9. Bendezu FO, de Boer PAJ. Conditional Lethality, Division Defects, Membrane Involution, and Endocytosis in *mre* and *mrd* Shape Mutants of *Escherichia coli*. *J Bacteriol*. 2008 Feb 20;190(5):1792–811.
  10. Youngman PJ, Perkins JB, Losick R. Genetic transposition and insertional mutagenesis in *Bacillus subtilis* with *Streptococcus faecalis* transposon Tn917. *Proc Natl Acad Sci U S A*. National Academy of Sciences; 1983 Apr;80(8):2305–9.
