# Supplementary material for: CbtA toxin of Escherichia coli inhibits cell division and cell elongation via direct and independent interactions with FtsZ and MreB
Source: PubMed Central journal article supplement (PMC5624674; doi:10.1371/journal.pgen.1007007), 2017-09-20
Supplement: pgen.1007007.s009.pdf [file pgen.1007007.s009.pdf]

**S3 Table. Plasmids used in this study.**

| Plasmid                                                                                                                                                                                               | Description                                                                                                                                                                                                                                                                                                               | Reference/Source |
|-------------------------------------------------------------------------------------------------------------------------------------------------------------------------------------------------------|---------------------------------------------------------------------------------------------------------------------------------------------------------------------------------------------------------------------------------------------------------------------------------------------------------------------------|------------------|
| <i>Bacterial two-hybrid constructs:</i>                                                                                                                                                               |                                                                                                                                                                                                                                                                                                                           |                  |
| pBR $\alpha$                                                                                                                                                                                          | Encodes the full-length $\alpha$ subunit of RNAP under the control of tandem <i>placUV5</i> and <i>p/pp</i> promoters; confers resistance to Carb                                                                                                                                                                         | [1]              |
| pAC $\lambda$ CI                                                                                                                                                                                      | Encodes $\lambda$ CI (residues 1-236) under the control of <i>lacUV5</i> promoter; confers resistance to Cm                                                                                                                                                                                                               | [1]              |
| pBR $\alpha$ - $\beta$ flap (831–1057)                                                                                                                                                                | Encodes residues 1-248 of $\alpha$ fused by a three-alanine linker residues 831–1057 of the $\beta$ subunit of <i>E. coli</i> RNAP under the control of tandem <i>placUV5</i> and <i>p/pp</i> promoters; confers resistance to Carb; used to generate NotI/BamHI-digested backbone to construct various $\alpha$ fusions. | [2]              |
| pAC $\lambda$ CI- $\beta$ flap (831–1057)                                                                                                                                                             | Encodes $\lambda$ CI (residues 1-236) fused via three alanines to residues 831–1057 of the $\beta$ subunit of <i>E. coli</i> RNAP under the control of <i>lacUV5</i> promoter; confers resistance to Cm; used to generate NotI/BamHI-digested backbone to construct various $\lambda$ CI fusions.                         | [2]              |
| pBR $\alpha$ -FtsZ (pMT153)                                                                                                                                                                           | Encodes residues 1-248 of $\alpha$ fused by a three-alanine linker to full-length <i>E. coli</i> FtsZ under the control of tandem <i>placUV5</i> and <i>p/pp</i> promoters; confers resistance to Carb                                                                                                                    | This study       |
| pBR $\alpha$ -FtsZ $\Delta$ 66 (pDH198)                                                                                                                                                               | pBR $\alpha$ -FtsZ encoding <i>E. coli</i> FtsZ residues 2-317; the last 66 residues are deleted                                                                                                                                                                                                                          | This study       |
| pBR $\alpha$ -FtsZ mutants isolated in two-hybrid screen:<br>pBR $\alpha$ -FtsZ-L169P<br>pBR $\alpha$ -FtsZ-L179R<br>pBR $\alpha$ -FtsZ-S177P<br>pBR $\alpha$ -FtsZ-D180N<br>pBR $\alpha$ -FtsZ-F182S | pBR $\alpha$ -FtsZ encoding the indicated substitution in the FtsZ moiety of the fusion                                                                                                                                                                                                                                   | This study       |
| pBR $\alpha$ -FtsZ-D180K (pDH160)                                                                                                                                                                     | pBR $\alpha$ -FtsZ encoding the D180K substitution in the FtsZ moiety of the fusion                                                                                                                                                                                                                                       | This study       |
| pAC $\lambda$ CI-FtsZ (pMT152)                                                                                                                                                                        | Encodes $\lambda$ CI fused by a three-alanine linker to full-length <i>E. coli</i> FtsZ under the control of <i>lacUV5</i> promoter; confers resistance to Cm                                                                                                                                                             | This study       |
| pAC $\lambda$ CI- <i>Bsu</i> FtsZ (pDH62)                                                                                                                                                             | Encodes $\lambda$ CI fused by a three-alanine linker to full-length <i>B. subtilis</i> FtsZ under the control of <i>lacUV5</i> promoter; confers resistance to Cm                                                                                                                                                         | This study       |
| pAC $\lambda$ CI- <i>Bsu</i> FtsZ (loop <sup><i>Eco</i></sup> ) (pDH69)                                                                                                                               | pAC $\lambda$ CI- <i>Bsu</i> FtsZ with residues 169-183 (ILEIVDKNTPMLEAF) replaced with <i>Eco</i> FtsZ residues 168-182 (LLKVLGRGISLDAF) in the <i>Bsu</i> FtsZ moiety of the fusion.                                                                                                                                    | This study       |

|                                                                                                                                                                                                                                                                                                                                                                                                                                                                                                                                                                                                                                                                                                                               |                                                                                                                                                                                            |            |
|-------------------------------------------------------------------------------------------------------------------------------------------------------------------------------------------------------------------------------------------------------------------------------------------------------------------------------------------------------------------------------------------------------------------------------------------------------------------------------------------------------------------------------------------------------------------------------------------------------------------------------------------------------------------------------------------------------------------------------|--------------------------------------------------------------------------------------------------------------------------------------------------------------------------------------------|------------|
| pBR $\alpha$ -MreB (pMT151)                                                                                                                                                                                                                                                                                                                                                                                                                                                                                                                                                                                                                                                                                                   | Encodes residues 1-248 of $\alpha$ fused by a three-alanine linker to <i>E. coli</i> MreB under the control of tandem <i>placUV5</i> and <i>p/pp</i> promoters; confers resistance to Carb | This study |
| pBR $\alpha$ -MreB mutants isolated in two-hybrid screen:<br>pBR $\alpha$ -MreB-I126V (pDH257)<br>pBR $\alpha$ -MreB-V173A (pDH256)<br>pBR $\alpha$ -MreB-E196G (pDH259)<br>pBR $\alpha$ -MreB-E262G (pDH258)                                                                                                                                                                                                                                                                                                                                                                                                                                                                                                                 | pBR $\alpha$ -MreB encoding the indicated substitution in the MreB moiety of the fusion                                                                                                    | This study |
| Additional pBR $\alpha$ -MreB mutants:<br>pBR $\alpha$ -MreB-K77D (pDH301)<br>pBR $\alpha$ -MreB-D78K (pDH302)<br>pBR $\alpha$ -MreB-F84A (pDH300)<br>pBR $\alpha$ -MreB-V121E (pDH293)<br>pBR $\alpha$ -MreB-R124D (pDH298)<br>pBR $\alpha$ -MreB-A125D (pDH299)<br>pBR $\alpha$ -MreB-R127D (pDH294)<br>pBR $\alpha$ -MreB-E128K (pDH295)<br>pBR $\alpha$ -MreB-R188D (pDH307)<br>pBR $\alpha$ -MreB-D192K (pDH303)<br>pBR $\alpha$ -MreB-E196K (pDH271)<br>pBR $\alpha$ -MreB-N200A (pDH309)<br>pBR $\alpha$ -MreB-R204D (pDH306)<br>pBR $\alpha$ -MreB-E262K (pDH272)<br>pBR $\alpha$ -MreB-G266E (pDH308)<br>pBR $\alpha$ -MreB-S269F (pDH305)<br>pBR $\alpha$ -MreB-V273E (pDH310)<br>pBR $\alpha$ -MreB-S284D (pDH316) | pBR $\alpha$ -MreB encoding the indicated substitution in the MreB moiety of the fusion                                                                                                    | This study |
| pAC $\lambda$ CI-MreB (pMT150)                                                                                                                                                                                                                                                                                                                                                                                                                                                                                                                                                                                                                                                                                                | Encodes $\lambda$ CI fused by a three-alanine linker to full-length <i>E. coli</i> MreB under the control of <i>lacUV5</i> promoter; confers resistance to Cm                              | This study |
| pBR $\alpha$ -CbtA (pMT155)                                                                                                                                                                                                                                                                                                                                                                                                                                                                                                                                                                                                                                                                                                   | Encodes residues 1-248 of $\alpha$ fused by a three alanine linker to CbtA under the control of tandem <i>placUV5</i> and <i>p/pp</i> promoters; confers resistance to Carb                | This study |
| pBR $\alpha$ -YpjF (pMT174)                                                                                                                                                                                                                                                                                                                                                                                                                                                                                                                                                                                                                                                                                                   | Encodes residues 1-248 of $\alpha$ fused by a three alanine linker to YpjF under the control of tandem <i>placUV5</i> and <i>p/pp</i> promoters; confers resistance to Carb                | This study |
| pBR $\alpha$ -Ykfl (pMT173)                                                                                                                                                                                                                                                                                                                                                                                                                                                                                                                                                                                                                                                                                                   | Encodes residues 1-248 of $\alpha$ fused by a three alanine linker to Ykfl under the control of tandem <i>placUV5</i> and <i>p/pp</i> promoters; confers resistance to Carb                | This study |
| pAC $\lambda$ CI-CbtA (pMT154)                                                                                                                                                                                                                                                                                                                                                                                                                                                                                                                                                                                                                                                                                                | Encodes $\lambda$ CI fused by a three-alanine linker to CbtA under the control of <i>lacUV5</i> promoter; confers resistance to Cm                                                         | This study |
| pAC $\lambda$ CI-CbtA-F65S (pMT180)                                                                                                                                                                                                                                                                                                                                                                                                                                                                                                                                                                                                                                                                                           | pAC $\lambda$ CI-CbtA encoding the F65S substitution in the CbtA moiety of the fusion                                                                                                      | This study |

|                                               |                                                                                                                                                               |            |
|-----------------------------------------------|---------------------------------------------------------------------------------------------------------------------------------------------------------------|------------|
| pAC $\lambda$ CI-CbtA-R15C (pDH246)           | pAC $\lambda$ CI-CbtA encoding the R15C substitution in the CbtA moiety of the fusion                                                                         | This study |
| pAC $\lambda$ CI-CbtA-V48E (pDH200)           | pAC $\lambda$ CI-CbtA encoding the V48E substitution in the CbtA moiety of the fusion                                                                         | This study |
| pAC $\lambda$ CI-YpjF (pMT170)                | Encodes $\lambda$ CI fused by a three-alanine linker to YpjF under the control of <i>lacUV5</i> promoter; confers resistance to Cm                            | This study |
| pAC $\lambda$ CI-YpjF-F65S (pMT192)           | pAC $\lambda$ CI-YpjF encoding the F65S substitution in the YpjF moiety of the fusion                                                                         | This study |
| pAC $\lambda$ CI-YpjF-C15R (pDH267)           | pAC $\lambda$ CI-YpjF encoding the C15R substitution in the YpjF moiety of the fusion                                                                         | This study |
| pAC $\lambda$ CI-Ykfl (pMT169)                | Encodes $\lambda$ CI fused by a three-alanine linker to Ykfl under the control of <i>lacUV5</i> promoter; confers resistance to Cm                            | This study |
| pAC $\lambda$ CI-Ykfl-F65S (pDH206)           | pAC $\lambda$ CI-Ykfl encoding the F65S substitution in the Ykfl moiety of the fusion                                                                         | This study |
| pAC $\lambda$ CI-Ykfl-C15R (pDH266)           | pAC $\lambda$ CI-Ykfl encoding the C15R substitution in the Ykfl moiety of the fusion                                                                         | This study |
| pAC $\lambda$ CI-ZipA <sub>CTD</sub> (pDH159) | Encodes $\lambda$ CI fused by a three-alanine linker to residues 186-328 of ZipA under the control of <i>lacUV5</i> promoter; confers resistance to Cm        | This study |
| pAC $\lambda$ CI-RodZ <sub>NTD</sub> (pDH238) | Encodes $\lambda$ CI fused by a three-alanine linker to the NTD of RodZ (residues 2-84) under the control of <i>lacUV5</i> promoter; confers resistance to Cm | This study |

*Toxin expression constructs:*

|        |                                                                                                                                                                                  |            |
|--------|----------------------------------------------------------------------------------------------------------------------------------------------------------------------------------|------------|
| p3-37  | Derivative of pCA24N; Encodes full-length His <sub>6</sub> -Ykfl-GFP under the control of <i>pT5-lac</i> promoter; pBR origin; confers resistance to Cm                          | [3]        |
| pMT136 | Derivative of pCA24N; Empty vector control plasmid encoding full-length His <sub>6</sub> -GFP under the control of <i>pT5-lac</i> promoter; pBR origin; confers resistance to Cm | This study |
| pMT138 | Derivative of pCA24N; Encodes full-length His <sub>6</sub> -YpjF-GFP under the control of <i>pT5-lac</i> promoter; pBR origin; confers resistance to Cm                          | This study |
| pMT139 | Derivative of pCA24N; Encodes full-length His <sub>6</sub> -CbtA-GFP under the control of <i>pT5-lac</i> promoter; pBR origin; confers resistance to Cm                          | This study |
| pMT144 | Derivative of pCA24N; Encodes full-length His <sub>6</sub> -Ykfl-F65S-GFP under the control of <i>pT5-lac</i> promoter; pBR origin; confers resistance to Cm                     | This study |

|                          |                                                                                                                                                                                                             |                   |
|--------------------------|-------------------------------------------------------------------------------------------------------------------------------------------------------------------------------------------------------------|-------------------|
| pMT146                   | Derivative of pCA24N; Encodes full-length His <sub>6</sub> -CbtA-F65S-GFP under the control of <i>pT5-lac</i> promoter; pBR origin; confers resistance to Cm                                                | This study        |
| pMT188                   | Derivative of pCA24N; Encodes full-length His <sub>6</sub> -YpjF-F65S-GFP under the control of <i>pT5-lac</i> promoter; pBR origin; confers resistance to Cm                                                | This study        |
| pDH253                   | Derivative of pCA24N; Encodes full-length His <sub>6</sub> -CbtA-R15C-GFP under the control of <i>pT5-lac</i> promoter; pBR origin; confers resistance to Cm                                                | This study        |
| pDH262                   | Derivative of pCA24N; Encodes full-length His <sub>6</sub> -CbtA-R15C/F65S-GFP under the control of <i>pT5-lac</i> promoter; pBR origin; confers resistance to Cm                                           | This study        |
| pBAD33                   | <i>araC</i> ; pACYC 184 origin; <i>pBAD</i> promoter with no insert; confers resistance to Cm                                                                                                               | [4]               |
| pDH212                   | <i>araC</i> ; pACYC 184 origin; <i>pBAD-cbtA-F65S</i> ; confers resistance to Cm                                                                                                                            | This study        |
| pDH289                   | <i>araC</i> ; pACYC 184 origin; <i>pBAD-ypjF-F65S</i> ; confers resistance to Cm                                                                                                                            | This study        |
| pSG360                   | Empty vector used for cloning genes downstream of a <i>placUV5</i> promoter with an additional <i>lacO</i> site; pCDF origin; confers resistance to Spec/Strep; <i>lacI<sup>f</sup></i>                     | S. Goldman        |
| pDH325                   | pSG360 derivative encoding untagged CbtA; confers resistance to Spec/Strep                                                                                                                                  | This study        |
| pDH326                   | pSG360 derivative encoding untagged CbtA-F65S; confers resistance to Spec/Strep                                                                                                                             | This study        |
| pDH327                   | pSG360 derivative encoding untagged CbtA-R15C; confers resistance to Spec/Strep                                                                                                                             | This study        |
| pDH328                   | pSG360 derivative encoding untagged CbtA-R15C/F65S; confers resistance to Spec/Strep                                                                                                                        | This study        |
| pSG369                   | Empty vector used for cloning genes downstream of a <i>ptet</i> promoter; pCDF origin; confers resistance to Spec/Strep; <i>tetR</i>                                                                        | S. Goldman        |
| pDH335                   | pSG369 derivative encoding untagged CbtA-F65S; confers resistance to Spec/Strep                                                                                                                             | This study        |
| pDH337                   | pSG369 derivative encoding untagged CbtA-R15C/F65S; confers resistance to Spec/Strep                                                                                                                        | This study        |
| <i>Other constructs:</i> |                                                                                                                                                                                                             |                   |
| pCX41                    | Bears a temperature-sensitive origin of replication and a HindIII/ClaI fragment containing wild-type <i>ftsZ</i> and flanking homology to <i>ftsA</i> and <i>lpxC</i> ; confers resistance to Cm (10 µg/mL) | [5]; T. Bernhardt |
| pCX41-F268C              | pCX41 derivative bearing <i>ftsZ-F268C</i>                                                                                                                                                                  | T. Bernhardt      |

|                     |                                                                                                                                                                                                     |                     |
|---------------------|-----------------------------------------------------------------------------------------------------------------------------------------------------------------------------------------------------|---------------------|
| pCX41-D180N (pDH33) | pCX41 derivative bearing <i>ftsZ-D180N</i>                                                                                                                                                          | This study          |
| pCX41-S177P (pDH34) | pCX41 derivative bearing <i>ftsZ-S177P</i>                                                                                                                                                          | This study          |
| pCX41-L169P (pDH35) | pCX41 derivative bearing <i>ftsZ-L169P</i>                                                                                                                                                          | This study          |
| pDR3                | Encodes full-length <i>E. coli</i> FtsZ under the control of <i>lac</i> promoter; ColE1 origin with <i>lacI<sup>q</sup></i> ; confers resistance to Carb                                            | [6,7]; T. Bernhardt |
| pDR3-D180N (pDH27)  | pDR3 derivative encoding FtsZ-D180N                                                                                                                                                                 | This study          |
| pDR3-S177P (pDH28)  | pDR3 derivative encoding FtsZ-S177P                                                                                                                                                                 | This study          |
| pDR3-F182S (pDH29)  | pDR3 derivative encoding FtsZ-F182S                                                                                                                                                                 | This study          |
| pDR3-L169P (pDH30)  | pDR3 derivative encoding FtsZ-L169P                                                                                                                                                                 | This study          |
| pDH84               | Encodes His <sub>6</sub> -GFP under the control of <i>pHYPERSPANK</i> ; confers resistance to Carb in <i>E. coli</i> and to MLS in <i>B. subtilis</i>                                               | This study          |
| pDH85               | Encodes His <sub>6</sub> -CbtA-GFP under the control of <i>pHYPERSPANK</i> ; confers resistance to Carb in <i>E. coli</i> and to MLS in <i>B. subtilis</i>                                          | This study          |
| pDH102              | Encodes His <sub>6</sub> -CbtA-F65S-GFP under the control of <i>pHYPERSPANK</i> ; confers resistance to Carb in <i>E. coli</i> and to MLS in <i>B. subtilis</i>                                     | This study          |
| pDR111              | Used for integration of sequences into <i>B. subtilis amyE</i> locus; confers resistance to Carb in <i>E. coli</i> and Spec in <i>B. subtilis</i>                                                   | D. Rudner           |
| pMLB1113            | Used as empty vector control for <i>mreB</i> complementation; ColE1 origin; Encodes LacZ under the control of the <i>lac</i> promoter; <i>lacI<sup>q</sup></i> ; confers resistance to Carb         | [8]; T. Bernhardt   |
| pFB149              | ColE1 origin; Encodes wild-type MreBCD under the control of the <i>lac</i> promoter. Residues LE are appended to the end of the MreD sequence; <i>lacI<sup>q</sup></i> ; confers resistance to Carb | [6]; T. Bernhardt   |
| pDH278              | pFB149 derivative encoding MreB-E262G and wild-type MreCD                                                                                                                                           | This study          |
| pDH332              | pFB149 derivative encoding MreB-S269F and wild-type MreCD                                                                                                                                           | This study          |

1. Dove SL, Joung JK, Hochschild A. Activation of prokaryotic transcription through arbitrary protein-protein contacts. *Nature*. 1997 Apr 10;386(6625):627–30.
2. Deighan P, Diez CM, Leibman M, Hochschild A, Nickels BE. The bacteriophage  $\lambda$  Q antiterminator protein contacts the  $\beta$ -flap domain of RNA polymerase. *Proc Natl Acad Sci U S A. National Acad Sciences*; 2008 Oct 7;105(40):15305–10.
3. Kitagawa M, Ara T, Arifuzzaman M, Ioka-Nakamichi T, Inamoto E, Toyonaga H, et al. Complete set of ORF clones of *Escherichia coli* ASKA library (A Complete Set of *E. coli* K-12 ORF Archive): Unique Resources for Biological Research. *DNA Res*. 2006 Jan 9;12(5):291–9.
4. Guzman LM, Belin D, Carson MJ, Beckwith J. Tight regulation, modulation, and high-level expression by vectors containing the arabinose P<sub>BAD</sub> promoter. *J Bacteriol. American Society for*

Microbiology (ASM); 1995 Jul;177(14):4121–30.

5. Wang XD, de Boer PA, Rothfield LI. A factor that positively regulates cell division by activating transcription of the major cluster of essential cell division genes of *Escherichia coli*. EMBO J. 1991 Nov;10(11):3363–72.
6. Bendezu FO, de Boer PAJ. Conditional Lethality, Division Defects, Membrane Involution, and Endocytosis in *mre* and *mrd* Shape Mutants of *Escherichia coli*. J Bacteriol. 2008 Feb 20;190(5):1792–811.
7. Bernhardt TG, de Boer PAJ. SlmA, a Nucleoid-Associated, FtsZ Binding Protein Required for Blocking Septal Ring Assembly over Chromosomes in *E. coli*. Mol Cell. 2005 May;18(5):555–64.
8. de Boer PA, Crossley RE, Rothfield LI. A division inhibitor and a topological specificity factor coded for by the minicell locus determine proper placement of the division septum in *E. coli*. Cell. 1989 Feb 24;56(4):641–9.
