# Supplementary material for: CbtA toxin of Escherichia coli inhibits cell division and cell elongation via direct and independent interactions with FtsZ and MreB
Source: PubMed Central journal article supplement (PMC5624674; doi:10.1371/journal.pgen.1007007), 2017-09-20
Supplement: pgen.1007007.s010.pdf [file pgen.1007007.s010.pdf]

**S4 Table. Oligonucleotides used in this study.**

| Name   | Sequence (5' to 3')                                      | Description                                                                                                       |
|--------|----------------------------------------------------------|-------------------------------------------------------------------------------------------------------------------|
| oDH30  | TCCCTGCTGAATGCGTTTGGCGCAGCG                              | For overlap PCR to generate <i>ftsZ-D180N</i>                                                                     |
| oDH31  | CGCTGCGCCAAACGCATTACAGCAGGG                              | For overlap PCR to generate <i>ftsZ-D180N</i>                                                                     |
| oDH32  | GCGGTATCCCCCTGCTGGATGCGTTTGG                             | For overlap PCR to generate <i>ftsZ-S177P</i>                                                                     |
| oDH33  | CCAAACGCATCCAGCAGGGGGATACCG                              | For overlap PCR to generate <i>ftsZ-S177P</i>                                                                     |
| oDH34  | GACAAACTGCCGAAAGTTCTGGGCCGCGG                            | For overlap PCR to generate <i>ftsZ-L169P</i>                                                                     |
| oDH35  | CCGCGGCCCCAGAACTTTTCGGCAGTTTG                            | For overlap PCR to generate <i>ftsZ-L169P</i>                                                                     |
| oDH36  | GCATTAAAGCTTCGCCAACAAGGGGTAAACATCACCTGG                  | Forward primer to clone <i>ftsZ</i> alleles into pCX41; contains HindIII site                                     |
| oDH37  | GCTTATCATCGATGCCCAAGCCC GCGAGA GCAG                      | Reverse primer to clone <i>ftsZ</i> alleles into pCX41; contains ClaI site                                        |
| oDH70  | TATATAGCGGCCGCATTTGAACCAATGGAAC                          | Forward primer for amplification of <i>ftsZ</i> ; contains a NotI site                                            |
| oDH71  | TATATAGGATCCTTAATCAGCTTGCTTACGC                          | Reverse primer for amplification of <i>ftsZ</i> ; contains BamHI site                                             |
| oDH86  | TATATAGCGGCCGCATTGGAGTTCGAAACAAACATAG                    | Forward primer for amplification of <i>Bsu ftsZ</i> ; contains a NotI site                                        |
| oDH87  | TATATAGGATCCTTAGCCGCGTTTATTACGG                          | Reverse primer for amplification of <i>Bsu ftsZ</i> ; contains BamHI site                                         |
| oDH101 | CAGGGAGATACCGCGGCCAGAACTTTTCAGCAGACGGTCGTTCCGGGATCACGATC | Reverse primer for overlap PCR to generate <i>Bsu ftsZ (loop<sup>Eco</sup>)</i>                                   |
| oDH102 | TGGGCCGCGGTATCTCCCTGCTGGATGCGTTTCCGCGAAGCGGATAACGTAC     | Forward primer for overlap PCR to generate <i>Bsu ftsZ (loop<sup>Eco</sup>)</i>                                   |
| oDH108 | ATATATATGCTAGCTTATTTGTATAGTTTCATCCATGCATGTGTAATC         | Reverse primer to clone <i>cbtA</i> alleles into <i>B. subtilis</i> integration constructs; contains NheI site    |
| oDH116 | ATATATAAGCTTACATAAGGAGGAAGCTACTATGAGAGGATCTCACCATCACCATC | Forward primer to clone <i>cbtA</i> alleles into <i>B. subtilis</i> integration constructs; contains HindIII site |
| oDH124 | ATATATGTCGACGTCTTAGGAGGATTTAGCATGTTGAGTTCCGAAACAAACATAG  | <i>B. subtilis ftsZ</i> sequencing primer                                                                         |
| oDH125 | ATATATGGATCCTTAGCCGCGTTTATTACGGTTTC                      | <i>B. subtilis ftsZ</i> sequencing primer                                                                         |
| oDH127 | TGACATGGTATTCTGTGACGC                                    | <i>B. subtilis ftsZ</i> sequencing primer                                                                         |
| oDH130 | CTCCGCTGCGTTGAAAGAG                                      | For construction of strain DH98                                                                                   |
| oDH131 | GGGCTGCAGGAATTCTTAGCCGCGTTTATTACGGTTTC                   | For construction of strain DH98                                                                                   |
| oDH132 | TAATAAACGCGGCTAAGAATTCCTGCAGCCCTGGCG                     | For construction of strain DH98                                                                                   |
| oDH133 | ATTTTGTCTTTACAGATCCCCCTATGCAAGGGTT                       | For construction of strain DH98                                                                                   |
| oDH134 | TTGCATAGGGGGATCTGTAAAGGACAAAATCGTTTTG                    | For construction of strain DH98                                                                                   |
| oDH135 | AGATGTCACACTCACATTG                                      | For construction of strain DH98                                                                                   |
| oDH141 | GATTTGCTGAAAAAGCTG                                       | For construction of strain DH99                                                                                   |
| oDH142 | GTTTGTTCGAACTCCAACATGCTAAATCCTCCTAATCTGCC                | For construction of strain DH99                                                                                   |
| oDH143 | TTAGGAGGATTTAGCATGTTGGAGTTTCGAAACAAACATAG                | For construction of strain DH99                                                                                   |
| oDH144 | GAAGCACCTTTTCCAATTCCG                                    | For construction of strain DH99                                                                                   |
| oDH167 | AAGCACATAAAAATATTCTG                                     | Amplifies <i>B. subtilis ftsA ftsZ</i>                                                                            |
| oDH168 | GCCAGTCACGTTACGTTATTAG                                   | Amplifies <i>B. subtilis ftsA ftsZ</i>                                                                            |
| oDH172 | ATAATAAACAGAGCAAAAATG                                    | <i>B. subtilis ftsZ</i> sequencing primer                                                                         |
| oDH173 | TTATAACATGTATTCCACGAAC                                   | <i>B. subtilis ftsZ</i> sequencing primer                                                                         |

|        |                                                                           |                                                                                             |
|--------|---------------------------------------------------------------------------|---------------------------------------------------------------------------------------------|
| oDH237 | TATATAGGATCCTCAGGCGTTGGCGTCTTTG                                           | Reverse primer for amplification of <i>zipA-CTD</i> ; contains a BamHI site                 |
| oDH238 | TATATAGCGGCCCGCAGATAAACCGAAGCGCAAAG                                       | Forward primer for amplification of <i>zipA-CTD</i> ; contains a NotI site                  |
| oDH239 | CCGCGGTATCTCCCTGCTGAAAGCGTTTGGCGCAGCGAACG                                 | For overlap PCR to generate <i>ftsZD180K</i>                                                |
| oDH240 | CGTTCGCTGCGCCAAACGCTTTCAGCAGGGAGATACCGCGG                                 | For overlap PCR to generate <i>ftsZD180K</i>                                                |
| oDH279 | TATATAGGATCCTTACATGCCGATACCTGTCCG                                         | Reverse primer to clone <i>ftsZΔ66</i> ; BamHI site                                         |
| oDH285 | ATATATTCTAGATTATTTGCGCTCCGGATACTTAC                                       | Reverse primer used to amplify <i>cbtA</i> for pBAD33; contains XbaI site                   |
| oDH286 | ATATATCATATGAAAACATTACCTGTATTACCCGGG                                      | Forward primer used to amplify <i>cbtA</i> for pBAD33; contains NdeI site                   |
| oDH289 | AATTTCTGCAGAATAACCG                                                       | Anneals downstream of chromosomal <i>mreD</i> ; used for PCR verification of <i>ΔmreBCD</i> |
| oDH307 | AAGTAAGCGGATTTTCTTTTCC                                                    | Anneals upstream of chromosomal <i>mreB</i> ; used for PCR verification of <i>ΔmreBCD</i>   |
| oDH336 | ATATATGCGGCCGCAAATACTGAAGCCACGCACG                                        | Forward primer for amplification of <i>rodZ-NTD</i> ; contains NotI site                    |
| oDH337 | ATATATGGATCCTTATTCCAGCCCTGGCAGCAG                                         | Reverse primer for amplification of <i>rodZ-NTD</i> ; contains BamHI site                   |
| oDH344 | ATATATGCGGCCGCAAAAACCTTTACCTGCAATAACTCAGCGGGCGGTGAAGCCCCGTCTGTACCCGTGGCTG | Forward mutagenic primer to introduce C15R into <i>ykfI</i> ; contains NotI site            |
| oDH345 | ATATATGCGGCCGCAAACTCTACCTGCTACAATTTCGAGGCGGCGAAGCCCCGCCTGTGCCAGTGGCTG     | Forward mutagenic primer to introduce C15R into <i>ypjF</i> ; contains NotI site            |
| oDH346 | GGTGGTGACCGTTTTCGACAAAGCTATCATCAACTATGTG                                  | <i>mreB</i> mutagenic forward primer; E196K                                                 |
| oDH347 | CACATAGTTGATGATAGCTTTGTGCGAAACGGTCACCACC                                  | <i>mreB</i> mutagenic reverse primer; E196K                                                 |
| oDH348 | ATCCTCGAAGCACTGCAGAAACCGCTGACCGGTATGTG                                    | <i>mreB</i> mutagenic forward primer; E262K                                                 |
| oDH349 | CACAATACCGGTCAGCGGTTTCTGCAGTGCTTCGAGGAT                                   | <i>mreB</i> mutagenic reverse primer; E262K                                                 |
| oDH355 | AAGTTATGCGTATTCTCG                                                        | Anneals between <i>mreB</i> and <i>mreC</i> ; used to sequence pFB149                       |
| oDH357 | GGTGGTACCACTGAAGCTGCTGTTATCTCCTTG                                         | <i>mreB</i> mutagenic forward primer; V173A                                                 |
| oDH358 | CAAGGAGATAACAGCAGCTTCAGTGGTACCACC                                         | <i>mreB</i> mutagenic reverse primer; V173A                                                 |
| oDH359 | GTTGAACGCCGCGCAGTTCGTGAATCCGCG                                            | <i>mreB</i> mutagenic forward primer; I126V                                                 |
| oDH360 | CGCGGATTCACGAACTGCGCGGCGTTCAAC                                            | <i>mreB</i> mutagenic reverse primer; I126V                                                 |
| oDH361 | GTGGTGACCGTTTTCGACGGAGCTATCATCAACTATG                                     | <i>mreB</i> mutagenic forward primer; E196G                                                 |
| oDH362 | CATAGTTGATGATAGCTCCGTGCGAAACGGTCACCAC                                     | <i>mreB</i> mutagenic reverse primer; E196G                                                 |
| oDH363 | CTCGAAGCACTGCAGGGACCGCTGACCGGTATTG                                        | <i>mreB</i> mutagenic forward primer; E262G                                                 |
| oDH364 | CAATACCGGTCAGCGGTCCCTGCAGTGCTTCGAG                                        | <i>mreB</i> mutagenic reverse primer; E262G                                                 |
| oDH369 | GCGTCGAGCCGCTGATCAG                                                       | Anneals within <i>mreD</i> sequence downstream of BamHI site                                |
| oDH372 | ATATATTCTAGACAGCTTTCAGGATTATCCCTTAGTA                                     | Forward primer to amplify <i>mreB</i>                                                       |

|        |                                              |                                                                                         |
|--------|----------------------------------------------|-----------------------------------------------------------------------------------------|
|        | TGTTGAAAAAATTTCTGTG                          | sequence for pFB149 derivatives; contains XbaI site                                     |
| oDH373 | CAGGAAACAGCTATGACCATG                        | Sequencing primer for pFB149 derivatives; anneals upstream of <i>mreB</i> and XbaI site |
| oDH374 | TGTGCTGCAAGGCGATTAAG                         | Sequencing primer for pFB149 derivatives; anneals downstream of <i>mreD</i>             |
| oDH375 | CGGCGGCGACCTGTTCAG                           | Sequencing primer for pFB149 derivatives; anneals upstream of <i>mreC</i>               |
| oDH380 | ATATATCATATGAACACTCTACCTGCTACAATTTCTG        | Forward primer used to amplify <i>ypjF</i> for pBAD33; contains NdeI site               |
| oDH381 | ATATATTCTAGATTATTTACATTAGTTTTTAG             | Reverse primer used to amplify <i>cbtA</i> for pBAD33; contains XbaI site               |
| oDH388 | GCCGGTTGGCGCGACCCAGGAAGAACGCCGCGCA<br>ATTCTG | <i>mreB</i> mutagenic forward primer; V121E                                             |
| oDH389 | CGAATTGCGCGGCGTTCTTCTGGGTCGCGCCAAC<br>CGGC   | <i>mreB</i> mutagenic reverse primer; V121E                                             |
| oDH390 | CCCAGGTTGAACGCCGCGCAGACCGTGAATCCGC<br>GCAGGG | <i>mreB</i> mutagenic forward primer; R127D                                             |
| oDH391 | CCCTGCGCGGATTCACGGTCTGCGCGGCGTTCAAC<br>CTGGG | <i>mreB</i> mutagenic reverse primer; R127D                                             |
| oDH392 | GAACGCCGCGCAATTCGTAAATCCGCGCAGGGCGC<br>TGG   | <i>mreB</i> mutagenic forward primer; E128K                                             |
| oDH393 | CCAGCGCCCTGCGCGGATTTACGAATTGCGCGGCG<br>TTC   | <i>mreB</i> mutagenic reverse primer; E128K                                             |
| oDH399 | CGACCCAGGTTGAACGCGACGCAATTCGTGAATCC<br>GCG   | <i>mreB</i> mutagenic forward primer; R124D                                             |
| oDH400 | CGCGGATTCACGAATTGCGTCGCGTTCAACCTGGG<br>TCG   | <i>mreB</i> mutagenic reverse primer; R124D                                             |
| oDH401 | GACCCAGGTTGAACGCCGCGACATTCGTGAATCCG<br>CGCAG | <i>mreB</i> mutagenic forward primer; A125D                                             |
| oDH402 | CTGCGCGGATTCACGAATGTCGCGGCGTTCAACCT<br>GGGTC | <i>mreB</i> mutagenic reverse primer; A125D                                             |
| oDH403 | GACGGCGTTATCGCCGACGCCTTCGTGACTGAAAA<br>AATG  | <i>mreB</i> mutagenic forward primer; F84A                                              |
| oDH404 | CATTTTTTCAGTCACGAAGGCGTCGGCGATAACGC<br>CGTC  | <i>mreB</i> mutagenic reverse primer; F84A                                              |
| oDH405 | GCTGCCATTCGCCAATGGACGACGGCGTTATCGC<br>CGAC   | <i>mreB</i> mutagenic forward primer; K77D                                              |
| oDH406 | GTCGGCGATAACGCCGTCGTCCATTGGGCGAATGG<br>CAGC  | <i>mreB</i> mutagenic reverse primer; K77D                                              |
| oDH407 | GCCATTCGCCAATGAAAAAGGCGTTATCGCCGA<br>CTTC    | <i>mreB</i> mutagenic forward primer; D78K                                              |
| oDH408 | GAAGTCGGCGATAACGCCTTTTTTCATTGGGCGAAT<br>GGC  | <i>mreB</i> mutagenic reverse primer; D78K                                              |
| oDH409 | CTGTGCGCATTGGTGGTAAACGTTTTGACGAAGCT<br>ATC   | <i>mreB</i> mutagenic forward primer; D192K                                             |
| oDH410 | GATAGCTTCGTGCAAACGTTTACCACCAATGCGCAC<br>AG   | <i>mreB</i> mutagenic reverse primer; D192K                                             |
| oDH413 | CGCTGACCGGTATTGTGTTGCGGTAATGGTTGCA<br>CTG    | <i>mreB</i> mutagenic forward primer; S269F                                             |
| oDH414 | CAGTGCAACCATTACCGCGAACACAATACCGGTCA<br>GCG   | <i>mreB</i> mutagenic reverse primer; S269F                                             |
| oDH415 | CATCAACTATGTGCGTGATAATTACGGTTCTCTGAT<br>CG   | <i>mreB</i> mutagenic forward primer; R204D                                             |
| oDH416 | CGATCAGAGAACCCTAATTATCACGCACATAGTTGA<br>TG   | <i>mreB</i> mutagenic reverse primer; R204D                                             |

|        |                                                                           |                                                                                                   |
|--------|---------------------------------------------------------------------------|---------------------------------------------------------------------------------------------------|
| oDH417 | GTTTACTCCTCTTCTGTGGACATTGGTGGTGACCGT<br>TTCG                              | <i>mreB</i> mutagenic forward primer;<br>R188D                                                    |
| oDH418 | CGAAACGGTCACCACCAATGTCCACAGAAGAGGAG<br>TAAAC                              | <i>mreB</i> mutagenic reverse primer;<br>R188D                                                    |
| oDH419 | CTGCAGGAACCGCTGACCGAAATTGTGAGCGCGGT<br>AATG                               | <i>mreB</i> mutagenic forward primer;<br>G266E                                                    |
| oDH420 | CATTACCGCGCTCACAATTTCCGGTCAGCGGTTCTG<br>CAG                               | <i>mreB</i> mutagenic reverse primer;<br>G266E                                                    |
| oDH421 | GTTTCGACGAAGCTATCATCGCATATGTGCGTCGTA<br>ATTACG                            | <i>mreB</i> mutagenic forward primer;<br>N200A                                                    |
| oDH422 | CGTAATTACGACGCACATATGCGATGATAGCTTCGT<br>CGAAAC                            | <i>mreB</i> mutagenic reverse primer;<br>N200A                                                    |
| oDH423 | GTATTGTGAGCGCGGTAATGGAAGCACTGGAACAG<br>TGCCCG                             | <i>mreB</i> mutagenic forward primer;<br>V273E                                                    |
| oDH424 | CGGGCACTGTTCCAGTGCTTCCATTACCGCGCTCA<br>CAATAC                             | <i>mreB</i> mutagenic reverse primer;<br>V273E                                                    |
| oDH434 | GTGCCCCGCCGAACTGGCTGACGACATCTCCGAGC<br>GCGG                               | <i>mreB</i> mutagenic forward primer;<br>S284D                                                    |
| oDH435 | CCGCGCTCGGAGATGTCGTCAGCCAGTTCGGCGG<br>GCAC                                | <i>mreB</i> mutagenic reverse primer;<br>S284D                                                    |
| oDH438 | CCGGCATTCCAGTCGTTGTTGCTAAAGACCCGCTG<br>ACCTGTGTGG                         | <i>mreB</i> mutagenic forward primer;<br>E319K                                                    |
| oDH439 | CCACACAGGTCAGCGGGTCTTTAGCAACAACGACT<br>GGAATGCCGG                         | <i>mreB</i> mutagenic reverse primer;<br>E319K                                                    |
| oDH446 | ATATATGAATTCAAGGAGATATACCATGAAAACATT<br>ACCTGTATTACCGG                    | Forward primer to clone <i>cbtA</i><br>variants into pSG360; contains<br>EcoRI site; includes RBS |
| oDH447 | ATATATAAGCTTTCATTTTCGCTCCGGATACTTACC<br>CAG                               | Reverse primer to clone <i>cbtA</i><br>variants into pSG360; contains<br>HindIII site             |
| oPDR31 | CCCTCTAGAAATAATTTTGTTTAACTTTAAGAAGGAG<br>ATATACATATGTTTGAACCAATGGAACCTTAC | For cloning <i>ftsZ</i> alleles into pDR3;<br>contains XbaI site                                  |
| oPDR32 | GCCAAGCTTGTGCGACTCTTAATCAGCTTGCTTACGC<br>AGG                              | For cloning <i>ftsZ</i> alleles into pDR3;<br>contains HindIII site                               |
| oPDR33 | GAATTCCCAGGGGATCTCGATCCCCG                                                | Sequencing primer for pDR3<br>derivatives                                                         |
| oPDR34 | ATGTGCTGCAAGGCGATTAAG                                                     | Sequencing primer for pDR3<br>derivatives                                                         |
| oSG623 | GGGCCATCGATGCCGCGGCATCTAGAGGCCTATG                                        | Annealed with oSG624 to form in-<br>frame linker with MCS for pMT136                              |
| oSG624 | AGGCCTCTAGATGCCGCGGCATCGATGGCCCTCA                                        | Annealed with oSG623 to form in-<br>frame linker with MCS for pMT136                              |
| oSG625 | AGGAGAAATTAECTATGAGAG                                                     | Sequencing primer for pCA24N-<br>derived plasmids                                                 |
| oSG626 | AACATCACCATCTAATTCAACAAG                                                  | Sequencing primer for pCA24N-<br>derived plasmids                                                 |
| oSG639 | GGGGACAAGTTTGTACAAAAAAGCAGGCTTCAACG<br>TTAACTACTACCTGCTACAATTTT           | Amplifies <i>ypjF</i> sequence (no start<br>codon); contains AclI site                            |
| oSG640 | GGGGACCACTTTGTACAAGAAAGCTGGGTCTCTAGA<br>TTTCACATTAGTTTTTAGCAAG            | Amplifies <i>ypjF</i> sequence (no stop<br>codon); contains XbaI site                             |
| oSG641 | GGGGACAAGTTTGTACAAAAAAGCAGGCTTCAACG<br>TTAAACATTACCTGTATTACCCG            | Amplifies <i>cbtA</i> sequence (no start<br>codon); contains AclI site                            |
| oSG642 | GGGGACCACTTTGTACAAGAAAGCTGGGTCTCTAG<br>ATTTTCGCTCCGGATACTTAC              | Amplifies <i>cbtA</i> sequence (no stop<br>codon); contains XbaI site                             |
| oSG659 | GGGGACAAGTTTGTACAAAAAAGCAGGCTTCAACG<br>TTAAACTTTTACCTGCAATAACTCAGCGG      | Amplifies <i>ykfI</i> sequence (no start<br>codon); contains AclI site                            |
| oSG660 | GGGGACCACTTTGTACAAGAAAGCTGGGTCTCTAG<br>ATCGTACTACGTTGTTACGGC              | Amplifies <i>ykfI</i> sequence (no stop<br>codon); contains XbaI site                             |
| oSG663 | CCCTAGCCGATGCCGTGAATTCTCTGGTAGAAAAA<br>TACGAGCTGG                         | Internal mutagenic primer to<br>introduce F65S into <i>ykfI</i> sequence                          |

|                    |                                                                         |                                                                        |
|--------------------|-------------------------------------------------------------------------|------------------------------------------------------------------------|
| oSG664             | CCAGCTCGTATTTTTCTACCAGAGAATTCACGGCA<br>TCGGCTAGGG                       | Internal mutagenic primer to introduce F65S into <i>ykfI</i> sequence  |
| oSG667             | TCACTGTGTGATGCGGTGAACTCTCTCGTGAAAA<br>ATACGCGCTGGTGCG                   | Internal mutagenic primer to introduce F65S into <i>cbtA</i> sequence  |
| oSG668             | CGCACCAGCGCGTATTTTTCCACGAGAGATTCAC<br>CGCATCACACAGTGA                   | Internal mutagenic primer to introduce F65S into <i>cbtA</i> sequence  |
| oSG723             | GGGGACAAGTTTGTACAAAAAAGCAGGCTTCGCG<br>GCCGCATTGAAAAATTTCTGTCGCATGTTTTCC | Forward primer for amplification of <i>mreB</i> ; contains a NotI site |
| oSG724             | GGGGACCACTTTGTACAAGAAAGCTGGGTCCGAT<br>CCTTACTCTTCGCTGAACAGGTCGCC        | Reverse primer for amplification of <i>mreB</i> ; contains BamHI site  |
| oSG727             | GGGGACAAGTTTGTACAAAAAAGCAGGCTTCGCG<br>GCCGCAAAAACATTACCTGTATTACCCGGG    | Forward primer for amplification of <i>cbtA</i> ; contains a NotI site |
| oSG728             | GGGGACCACTTTGTACAAGAAAGCTGGGTCCGAT<br>CCTTATTTTCGCTCCGGATACTTACC        | Reverse primer for amplification of <i>cbtA</i> ; contains BamHI site  |
| oSG729             | GGGGACAAGTTTGTACAAAAAAGCAGGCTTCGCG<br>GCCGCAAAAACCTTACCTGCAATAACTCAGCGG | Forward primer for amplification of <i>ykfI</i> ; contains a NotI site |
| oSG730             | GGGGACCACTTTGTACAAGAAAGCTGGGTCCGAT<br>CCTTATCGTACTACGTTGTTACGGC         | Reverse primer for amplification of <i>ykfI</i> ; contains BamHI site  |
| oSG731             | GGGGACAAGTTTGTACAAAAAAGCAGGCTTCGCG<br>GCCGCAAAACACTCTACCTGCTACAATTTTCGC | Forward primer for amplification of <i>ypjF</i> ; contains a NotI site |
| oSG732             | GGGGACCACTTTGTACAAGAAAGCTGGGTCCGAT<br>CCTTATTTACATTAGTTTTTAGCAAGCCGG    | Reverse primer for amplification of <i>ypjF</i> ; contains BamHI site  |
| pBR $\alpha$ _F    | GAACAGCGTACCGACCTGGAC                                                   | Sequencing primer for all pBR $\alpha$ fusion constructs               |
| pBR $\alpha$ _R    | CCTATATCGCCGACATCACC                                                    | Sequencing primer for all pBR $\alpha$ fusion constructs               |
| pAC $\lambda$ CI_F | GATCAGGGATAGCGGTCAGG                                                    | Sequencing primer for all pAC $\lambda$ CI fusion constructs           |
| pAC $\lambda$ CI_R | CCTACATCTGTATTAACGAAGC                                                  | Sequencing primer for all pAC $\lambda$ CI fusion constructs           |
